# Supplementary material for: MoS2/PPy Nanocomposite as a Transducer for Electrochemical Aptasensor of Ampicillin in River Water
Source: MDPI journal article supplement (doi:10.3390/bios11090311), 2021-09-01
Supplement: s1 [file s1]

## SUPPLEMENTARY MATERIAL

### MoS<sub>2</sub>/PPy nanocomposite as transducer for electrochemical aptasensor of ampicillin in river water

M. Hamami<sup>a,b</sup>, M. Bouaziz<sup>a,c</sup>, N. Raouafi<sup>b</sup>, A. Bendounan<sup>c</sup>, H. Korri-Yousseufi<sup>a\*</sup>

<sup>a</sup>Université Paris-Saclay, CNRS, Institut de Chimie Moléculaire et des Matériaux d'Orsay (ICMMO), ECBB, Bât 420, 2 Rue du Doyen Georges Poitou, 91400, Orsay, France.

<sup>b</sup>Université de Tunis El Manar, Faculté des Sciences, Laboratoire de Chimie Analytique et Electrochimie (LR99ES15), Campus universitaire de Tunis El Manar, 2092 Tunis El-Manar, Tunisia

<sup>c</sup>Synchrotron-SOLEIL, Saint-Aubin, BP48, F91192, Gif sur Yvette Cedex, France

#### SI.1. Material and methods

##### SI.1.1. Synthesis of the naphthoquinone derivative

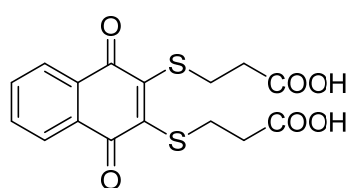

<sup>1</sup>H NMR (d6-DMSO)  $\delta$  2.65–2.69 (t, 2H), 3.11–3.12 (t, 2H), 6.77 (s, 1H), 7.81–7.86 (m, 2H), 7.95–7.97 (m, 2H); <sup>13</sup>C NMR (d6-DMSO)  $\delta$  24.76, 31.95, 126.03, 126.34, 127.28, 131.43, 131.68, 133.65, 134.74, 153.40, 172.48, 180.95, 181.83;

##### SI.1.2. Preparation of MoS<sub>2</sub> nanosheets

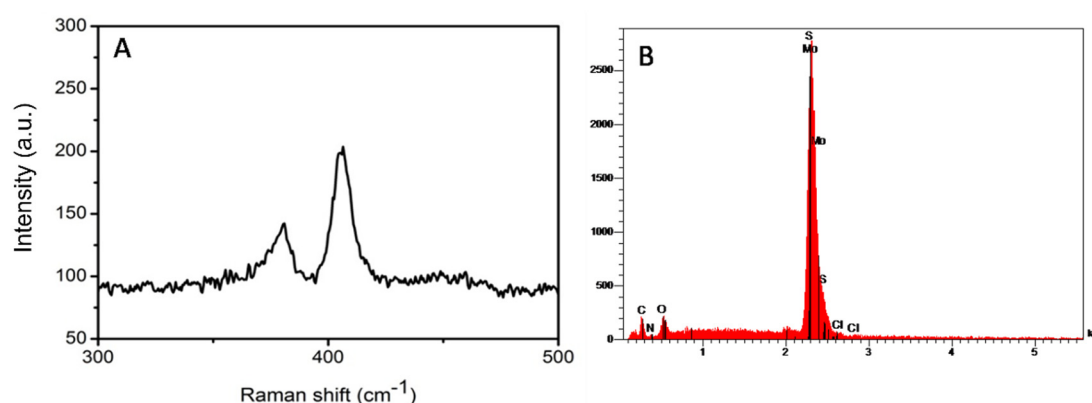

**Figure S1.** (A) Raman Spectra of MoS<sub>2</sub> nanosheets and (B) EDX analysis of the modified SPCE with MoS<sub>2</sub> nanosheets

### SL.1.3. Electrodeposition of MoS<sub>2</sub> on SPCE

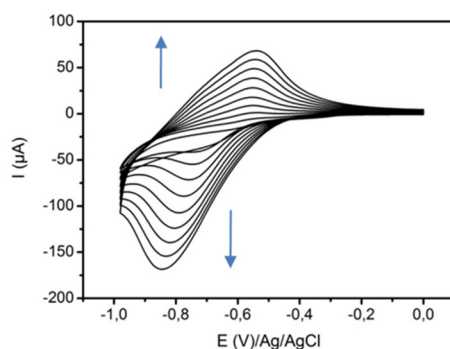

**Figure S2.** Electrodeposition of MoS<sub>2</sub> by cycling the potential between -0.1V and -0.95V, for 10 cycles at scan rate 100 mV.s<sup>-1</sup> in 0.5 M LiClO<sub>4</sub>.

### SL.1.4. Electropolymerization of PPyNPs on SPCE

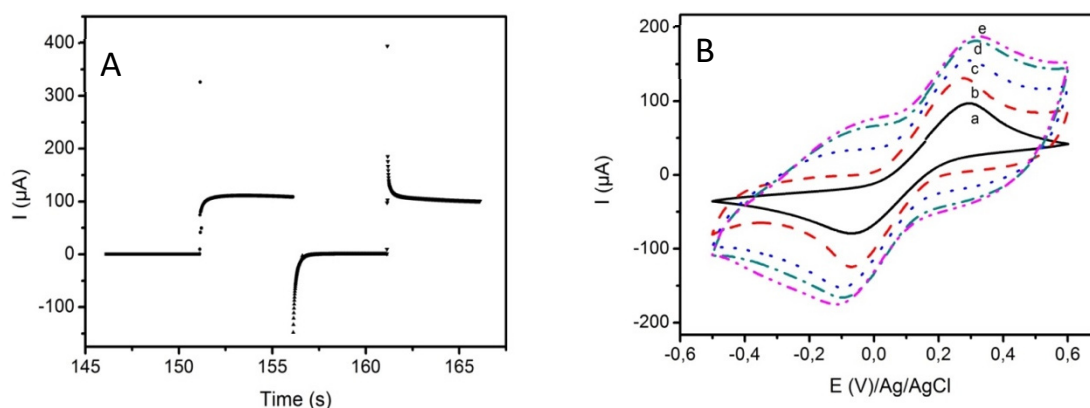

**Figure S3.** Electropolymerization of PPy by 2 pulses with  $E_{app} = 0.8$  V during 5s in 0.5M LiClO<sub>4</sub> (A) CVs recorded in 5 mM [Fe(CN)<sub>6</sub>]<sup>3/4-</sup> at  $v = 100$  mV.s<sup>-1</sup> before and after PPy electropolymerization (B.a) SPCE (B.b) 1 pulse (B.c) 2 pulses (B.d) 3 pluses and (B.e) 4 pulses

### SL.1.5. Electrodeposition of EDA and Cystamine

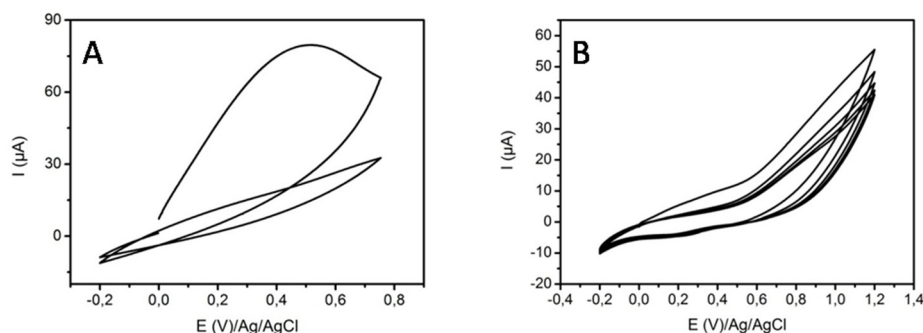

**Figure S4.** (A) CVs of Electrodeposition of EDA by cycling the potential between -0.2V and 0.8V, for 2cycles at scan rate 200 mV.s<sup>-1</sup>, in 0.5 M LiClO<sub>4</sub>, (B) Electrodeposition of Cystamine by cycling the potential between -0.2V and 1.2V, for 4 cycles at scan rate 100 mV/s, in 0.5 M LiClO<sub>4</sub>

## SI.2 Results and discussion

### SI.2.1 Properties of MoS<sub>2</sub> and PPy

#### SI.2.1.1 Structural and morphological studies

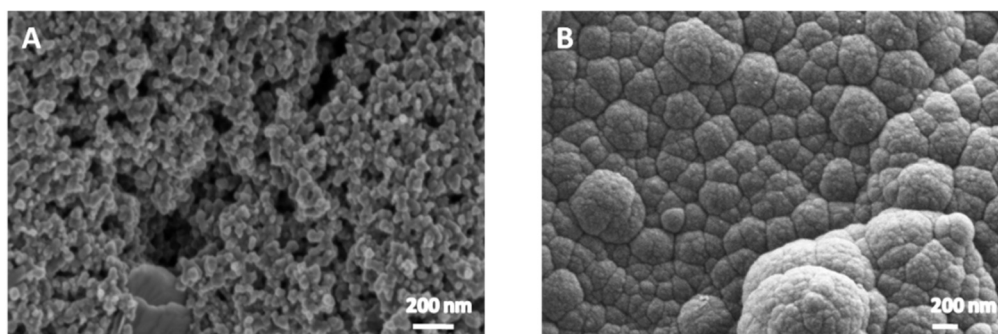

**Figure S5.** SEM images of (A) SPCE (B) SPCE/PPy Polypyrrole deposits using cyclic voltammetry

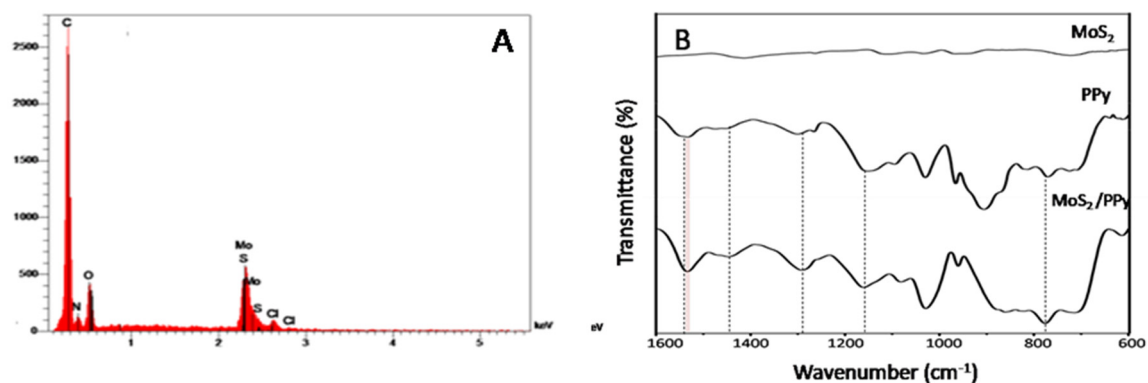

**Figure S6.** (A) EDX analysis of the modified SPCE with MoS<sub>2</sub>/PPy and (B) FT-IR MoS<sub>2</sub> nanosheets, PPy and MoS<sub>2</sub>/NPsPPy

#### SI.2.1.2. Electrochemical characterization of the nanocomposite

**Table S1.** Fitting parameters of EIS data

| Equivalent circuit model                                                          | Modified electrode         | $R_s$<br>/ $\Omega$ | $R_{ct}$<br>/ $\Omega$ | Capacitance<br>$\mu F$ | CPE1<br>$\mu Mho$ | n    | CPE2<br>$\mu Mho$ | n     | W<br>$\mu Mho$ | $\chi^2$ |
|-----------------------------------------------------------------------------------|----------------------------|---------------------|------------------------|------------------------|-------------------|------|-------------------|-------|----------------|----------|
| 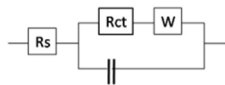 | SPCE                       | 321.01              | 849.7                  | 0.976                  | -                 | -    | -                 | -     | 669            | 0.1      |
|  | SPCE/MoS <sub>2</sub>      | 316.7               | 411.61                 | 1.19                   | -                 | -    | -                 | -     | 1410           | 0.029    |
|  | SPCE/PPy                   | 303.34              | 197.14                 | -                      | 288               | 0.54 | 860               | 0.95  | -              | 0.001    |
|  | SPCE/MoS <sub>2</sub> /PPy | 306.55              |                        | 22.7                   | -                 | -    | 2190              | 0.634 | -              | 0.01     |

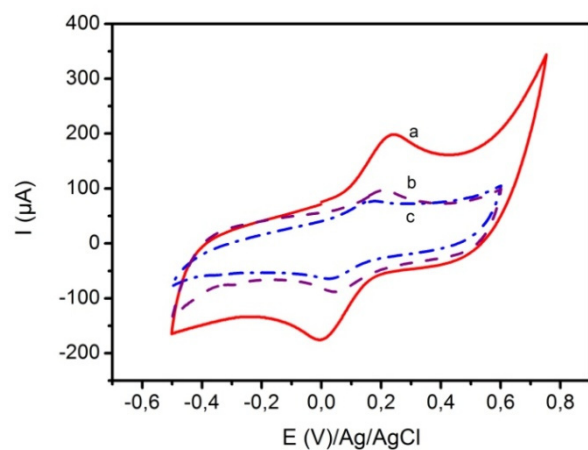

**Figure S7.** CVs recorded in presence of 5 mM  $[\text{Fe}(\text{CN})_6]^{3/4-}$  (a) SPCE/MoS<sub>2</sub>/PPy ; (b) SPCE/MoS<sub>2</sub>/PPy/EDA ;(c) SPCE/MoS<sub>2</sub>/PPy/EDA/NQ ;

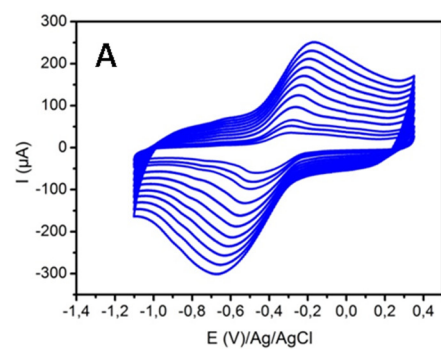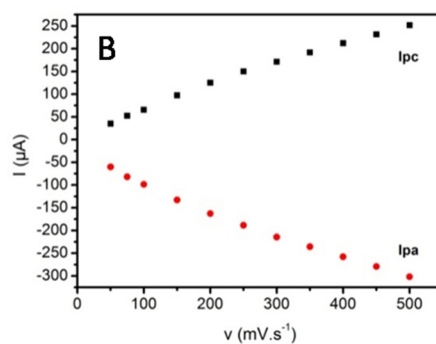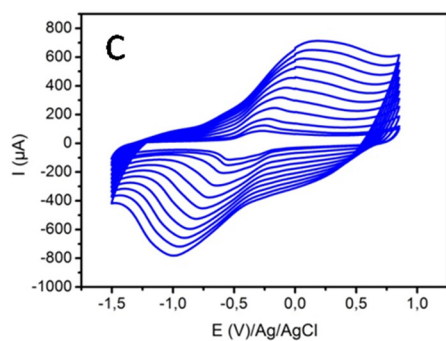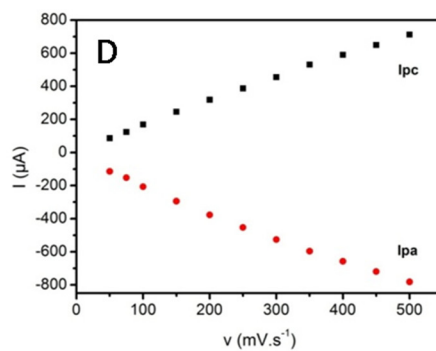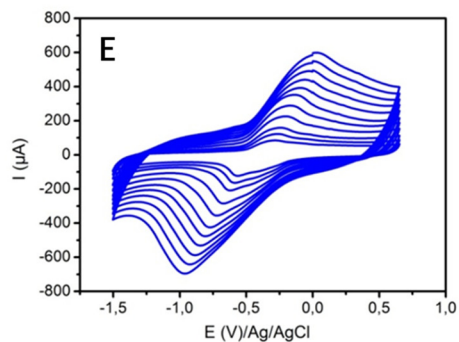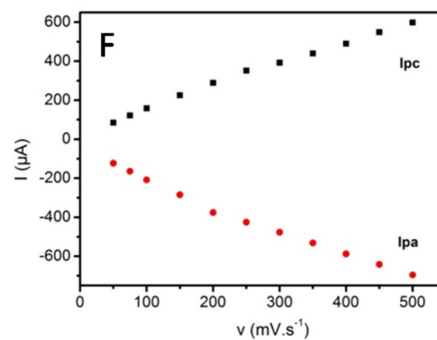

**Figure S8.** CVs of the redox signal of NQ in various modified SPCE in PBS pH= 7.4 with scan rate from 50 to 500 mV.s<sup>-1</sup> and Linear relationship of the redox peak currents versus scan rate (A, B) MoS<sub>2</sub>/Cyst/NQ, (C, D) PPy/EDA/NQ, (E, F) MoS<sub>2</sub>/PPy/EDA/NQ.

### SI.2.2. Electrochemical characterization of the biolayers

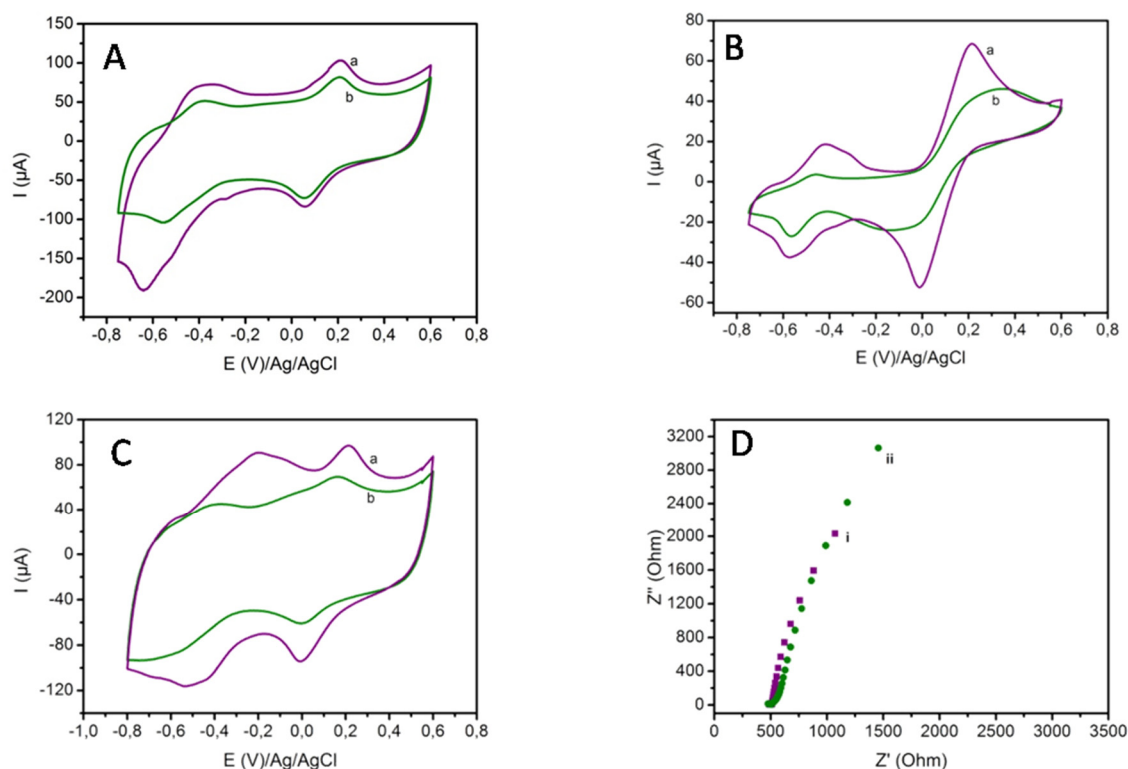

**Figure S9.** CVs recorded in presence of 5 mM [Fe(CN)<sub>6</sub>]<sup>3/4-</sup> before and after aptamer immobilization (A.a) SPCE/MoS<sub>2</sub>/PPy/EDA/NQ; (A.b) SPCE/MoS<sub>2</sub>/PPy/EDA/NQ/APT; (B.a) SPCE/MoS<sub>2</sub>/Cyst/NQ, (B.b) SPCE/MoS<sub>2</sub>/Cyst/NQ / APT; (C.a) SPCE/PPy/EDA/NQ; (C.b) SPCE/PPy/EDA/NQ/APT; EIS (Nyquist plots) in presence of 5 mM [Fe(CN)<sub>6</sub>]<sup>3/4-</sup> obtained before (D) (i) and after (D) (ii) aptamer immobilization ( $E_{app}$ = 0.2V ) Frequency range: 100 KHz to 0.1 Hz.

### SI.2.3. Comparison of sensing platforms based on MoS<sub>2</sub>

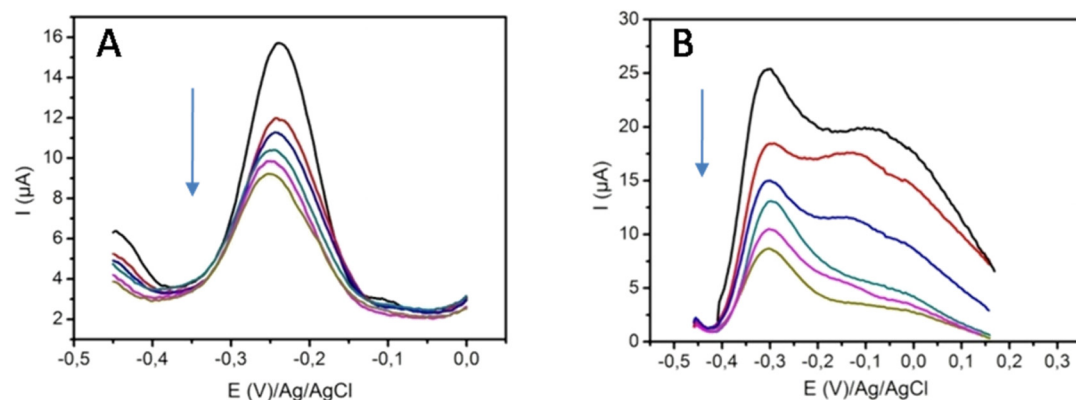

**Figure S10.** SWV of the oxidation peak after incubation at various ampicillin concentrations from 50 to 250 pg/L in PBS for (A) MoS<sub>2</sub> based electrode (B) PPy based electrode

#### SL.2.4. Detection in waste water

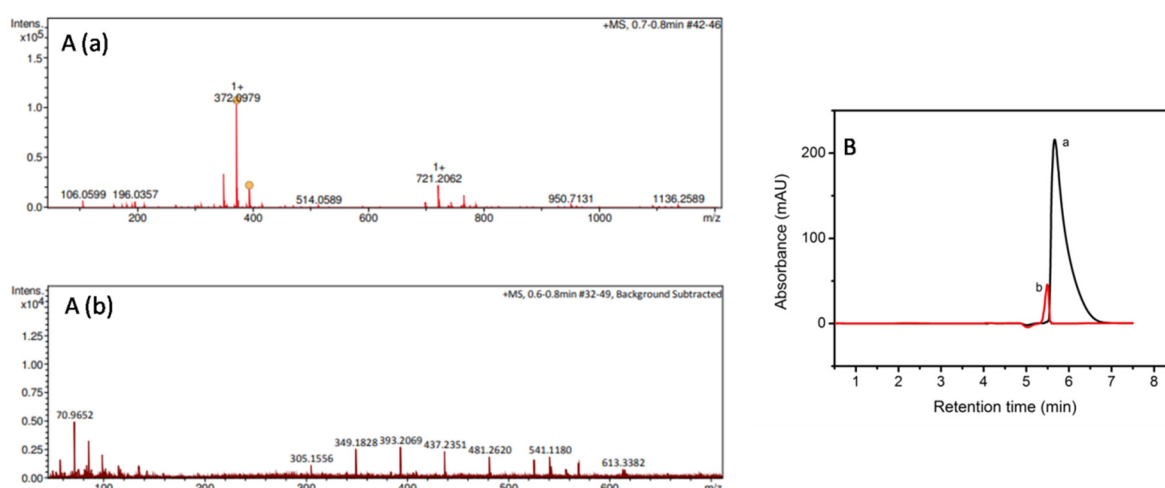

**Figure S11.** Mass Spectra of (a) water doped with AMP and (b) river water (B) High performance liquid chromatography (HPLC) analysis of (a) Ampicillin solution and (b) waste water sample
